# Supplementary material for: A novel, facile, rapid, solvent free protocol for the one pot green synthesis of chromeno[2,3-d]pyrimidines using reusable nano ZnAl2O4– a NOSE approach and photophysical studies
Source: Royal Society of Chemistry journal article supplement (doi:10.1039/c4ra16263c), 2014-12-16

### <sup>1</sup>H-NMR spectrum of 4a

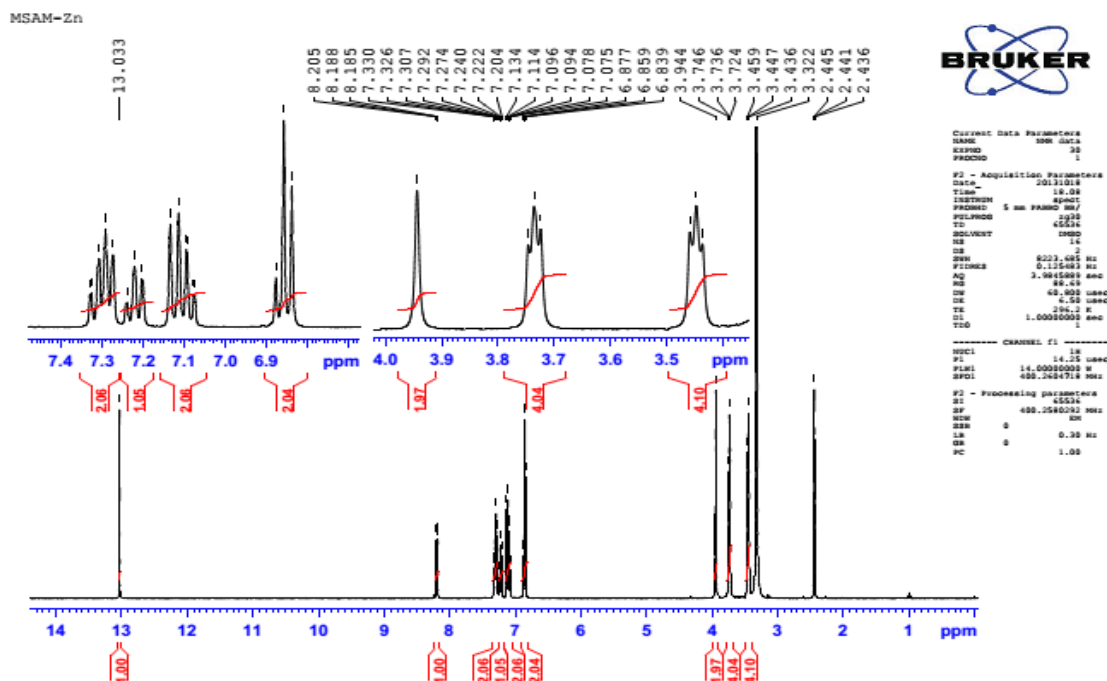

### <sup>13</sup>C-NMR spectrum of 4a

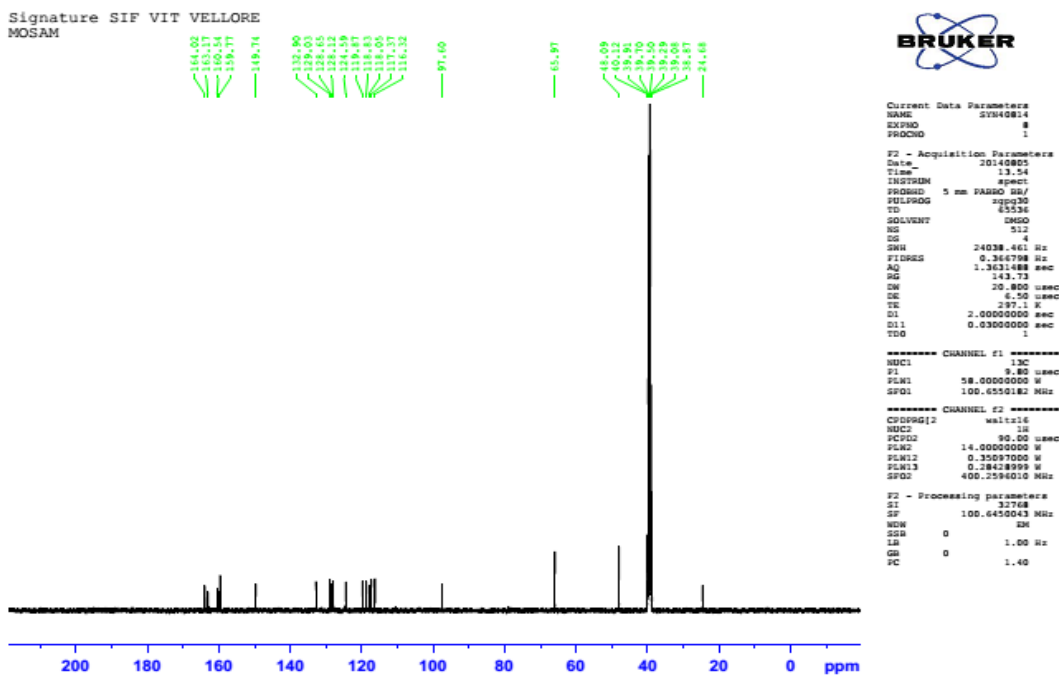

# <sup>1</sup>H-NMR spectrum of 4b

Signature SIF VIT VELLORE  
MONPSM

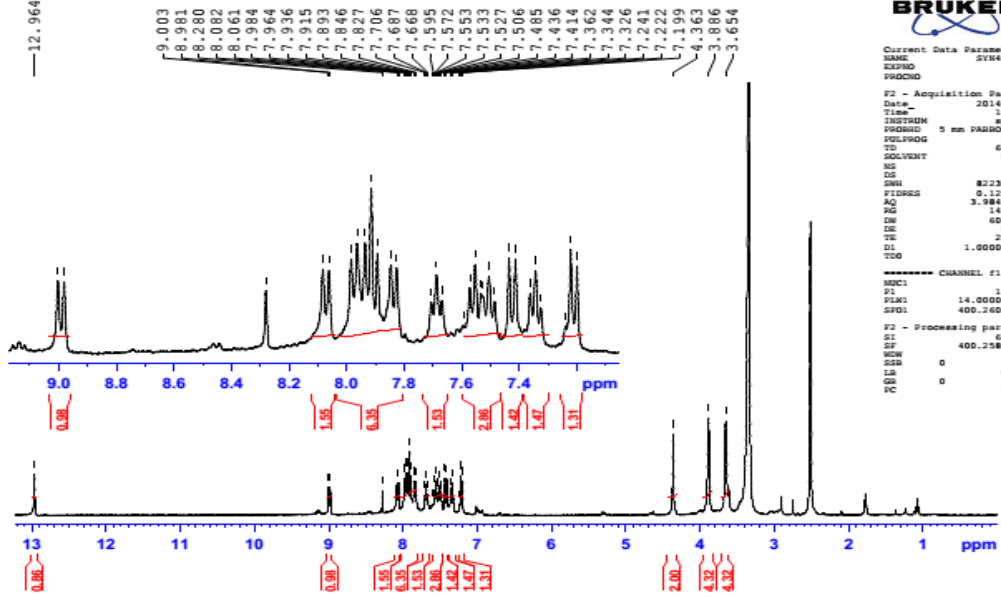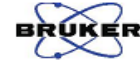

Current Data Parameters  
 NAME: 20140414  
 EXPNO: 66  
 PROCNO: 1  
 F2 - Acquisition Parameters  
 Date\_: 20140410  
 Time: 10.10  
 INSTRUM: spect  
 PROBRD: 5 mm PABBO BB/  
 PULPROG: zg30  
 TD: 65536  
 SOLVENT: DMSO  
 NS: 16  
 DS: 2  
 SSB: 0  
 FIDRES: 0.223685 Hz  
 AQ: 0.125483 Hz  
 RG: 3.1843883 sec  
 PG: 143.73  
 DM: 60.800 usec  
 DE: 6.50 usec  
 TE: 296.3 K  
 D1: 1.00000000 sec  
 TDO: 1  
 ----- CHANNEL f1 -----  
 NUC1: 1H  
 P1: 14.25 usec  
 PL1: 14.0000000 W  
 SFO1: 400.2604718 MHz  
 F2 - Processing parameters  
 SI: 65536  
 SF: 400.260000 MHz  
 WDW: EM  
 SSB: 0  
 LB: 0.30 Hz  
 GB: 0  
 PC: 1.00

# <sup>1</sup>H-NMR spectrum of 4c

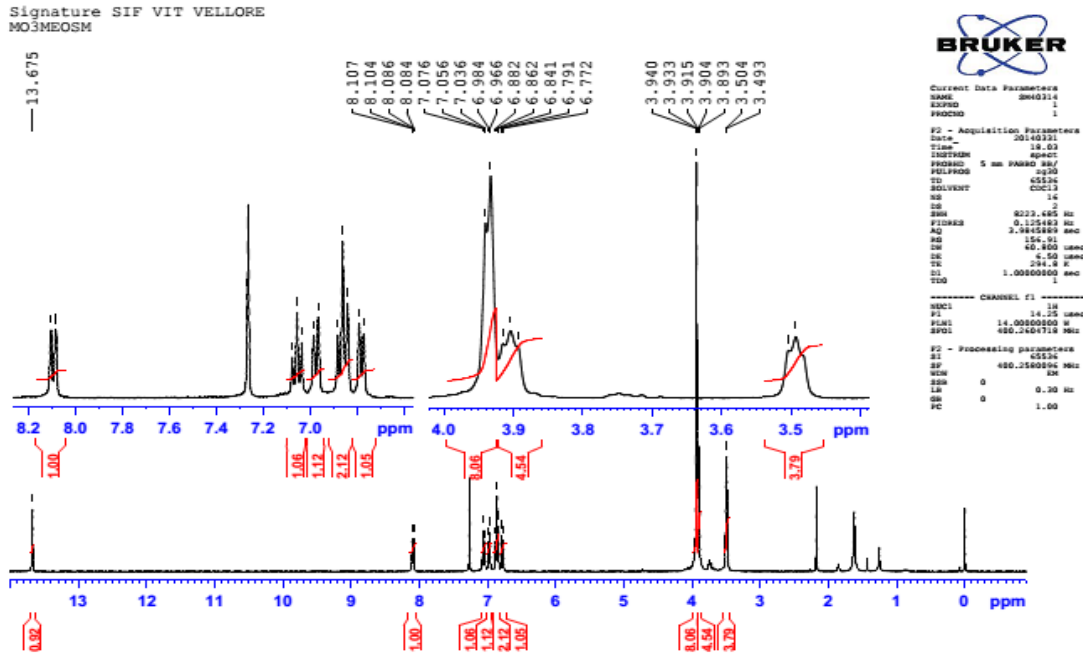

# <sup>13</sup>C-NMR spectrum of 4c

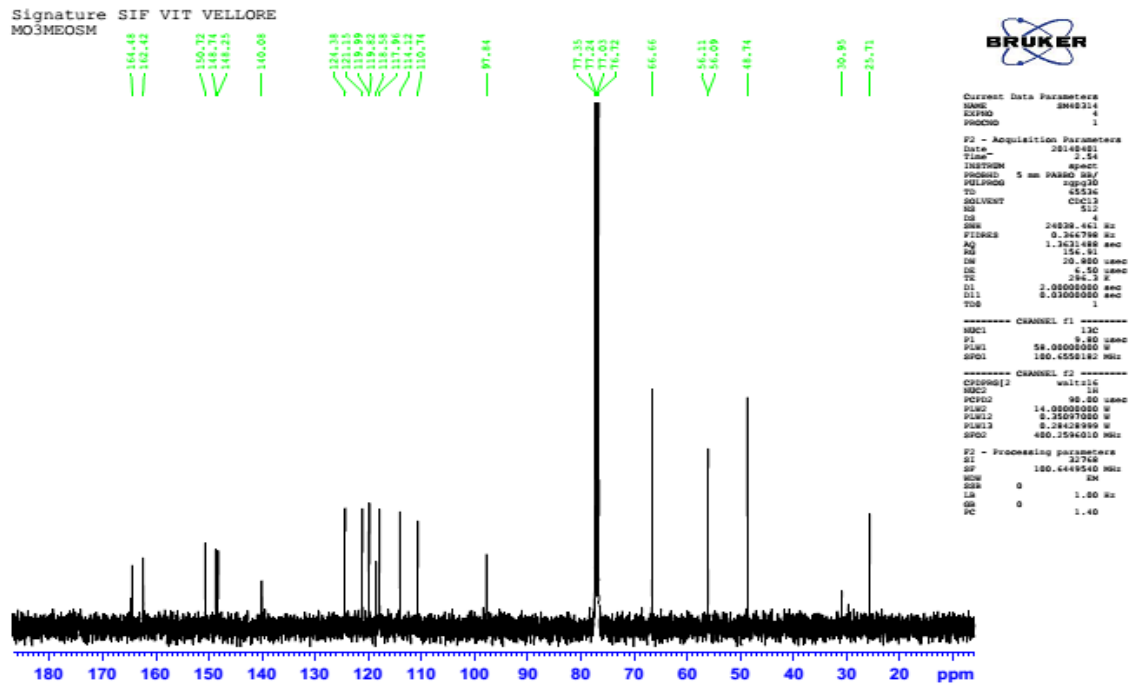



# <sup>1</sup>H-NMR spectrum of 4e

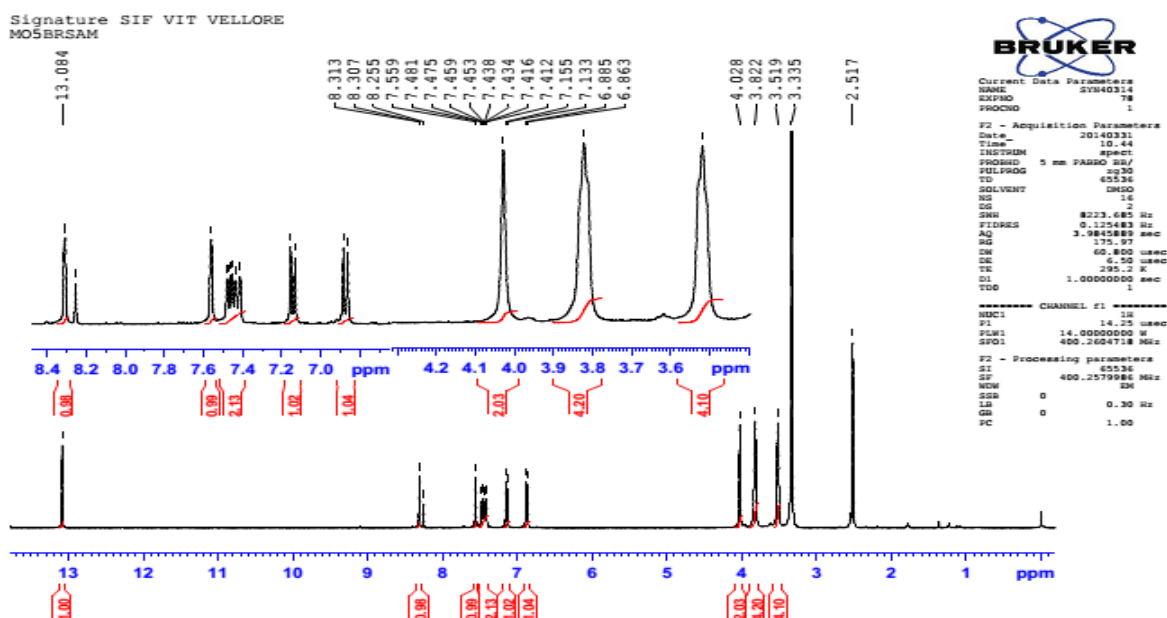

# <sup>13</sup>C-NMR spectrum of 4e

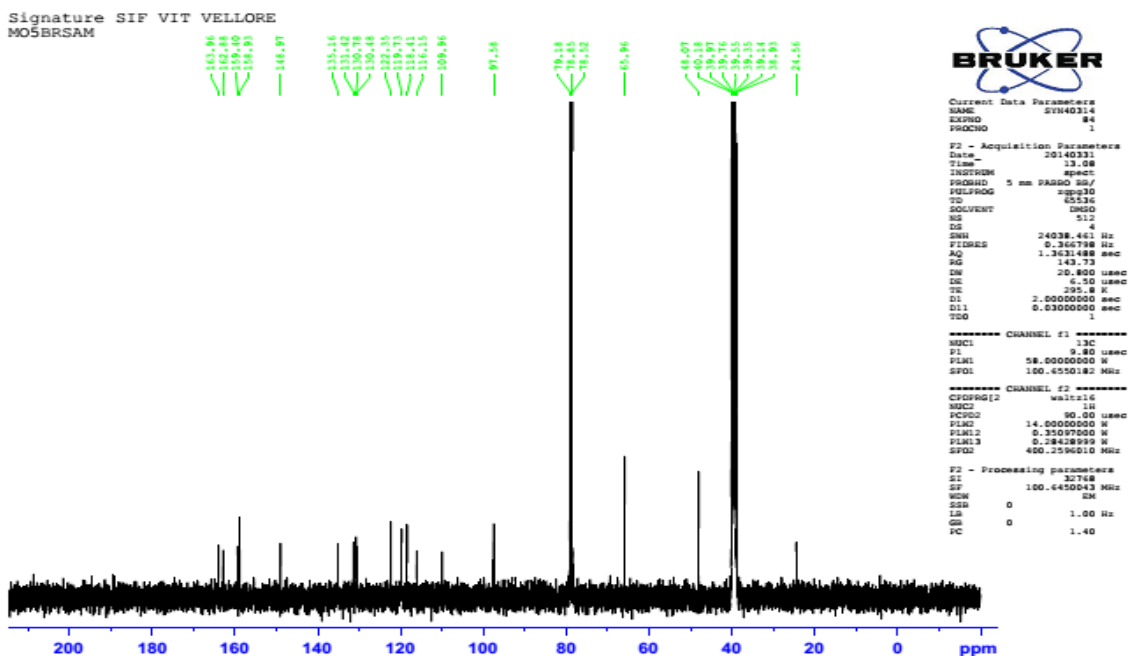

# <sup>1</sup>H-NMR spectrum of 4f

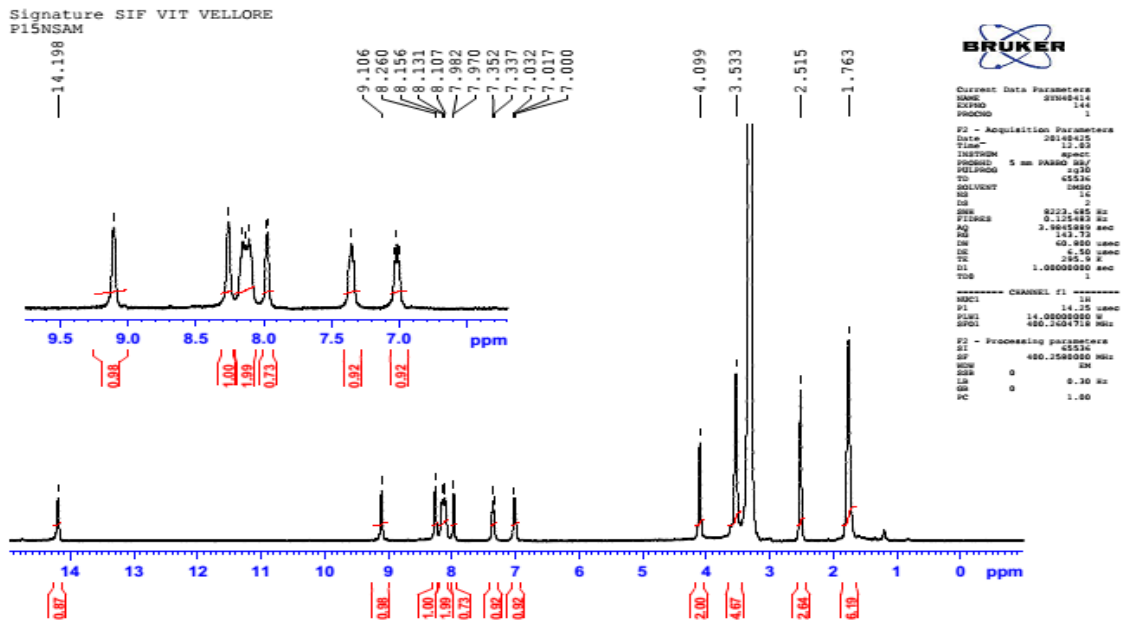



# <sup>1</sup>H-NMR spectrum of 4h

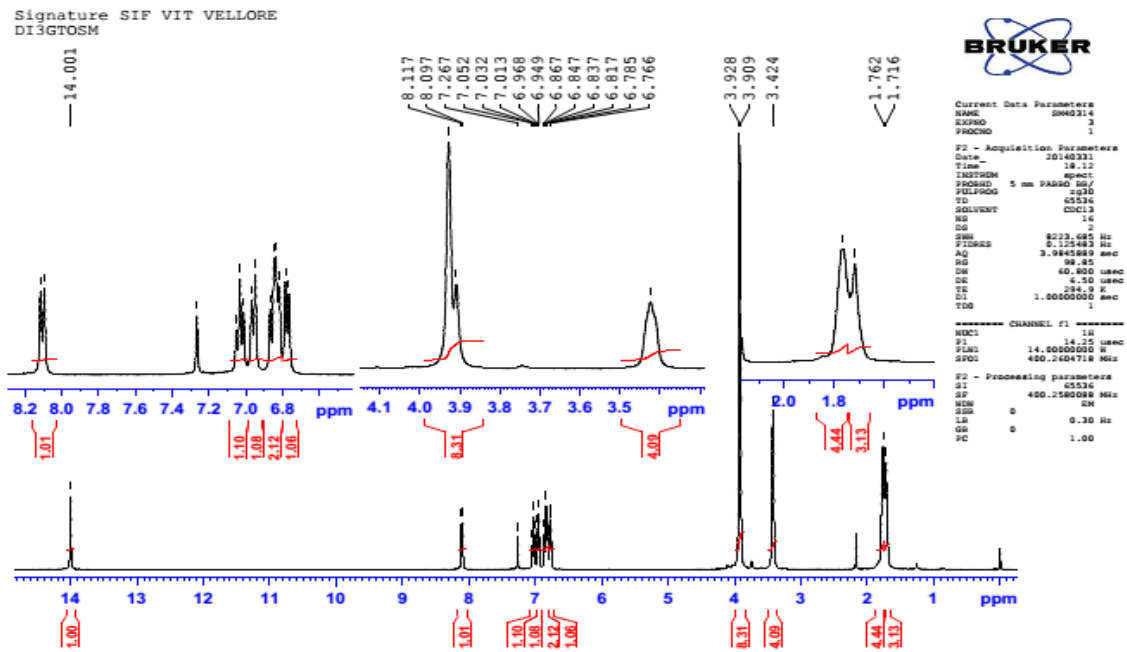

# <sup>13</sup>C-NMR spectrum of 4h

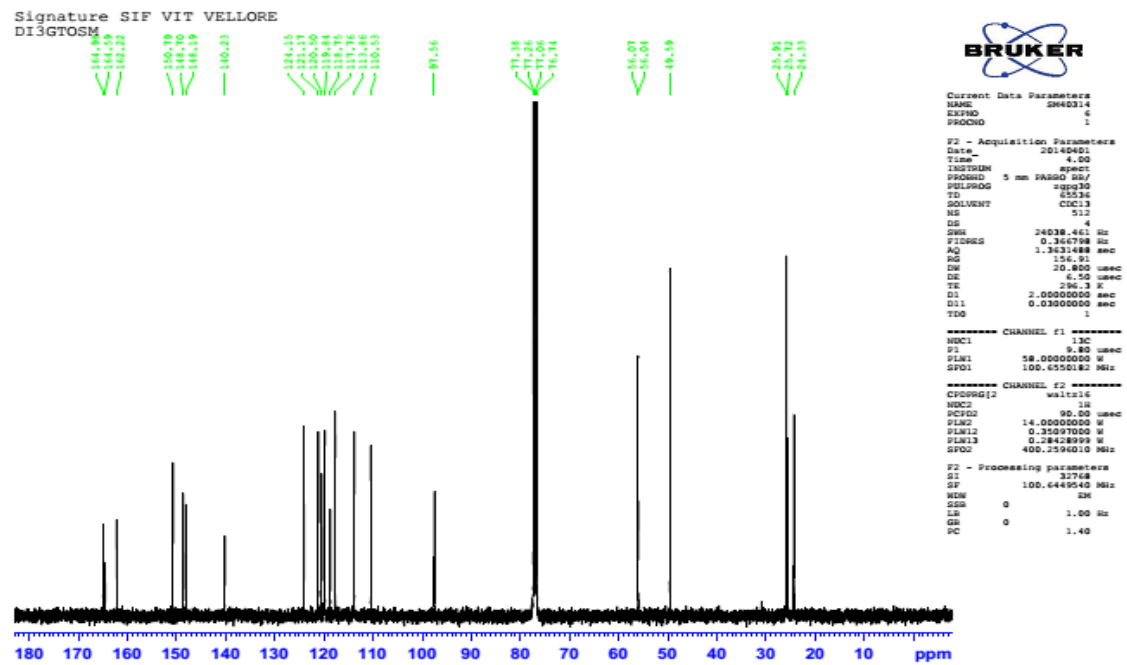



# <sup>1</sup>H-NMR spectrum of 4i

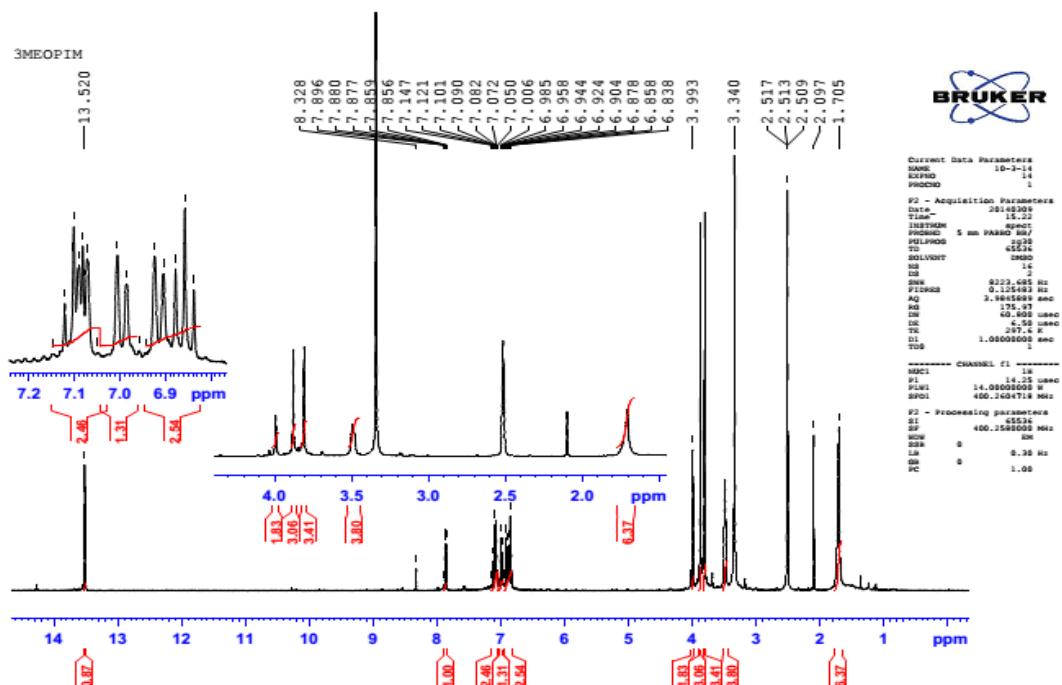

# <sup>13</sup>C-NMR spectrum of 4i

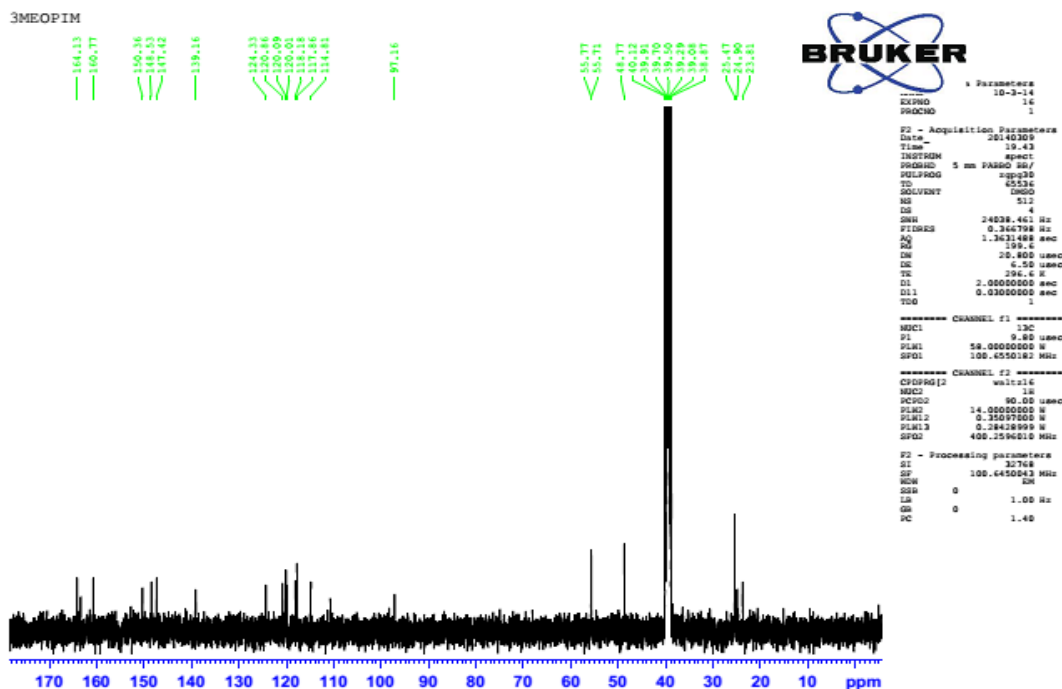

# <sup>1</sup>H-NMR spectrum of 4j

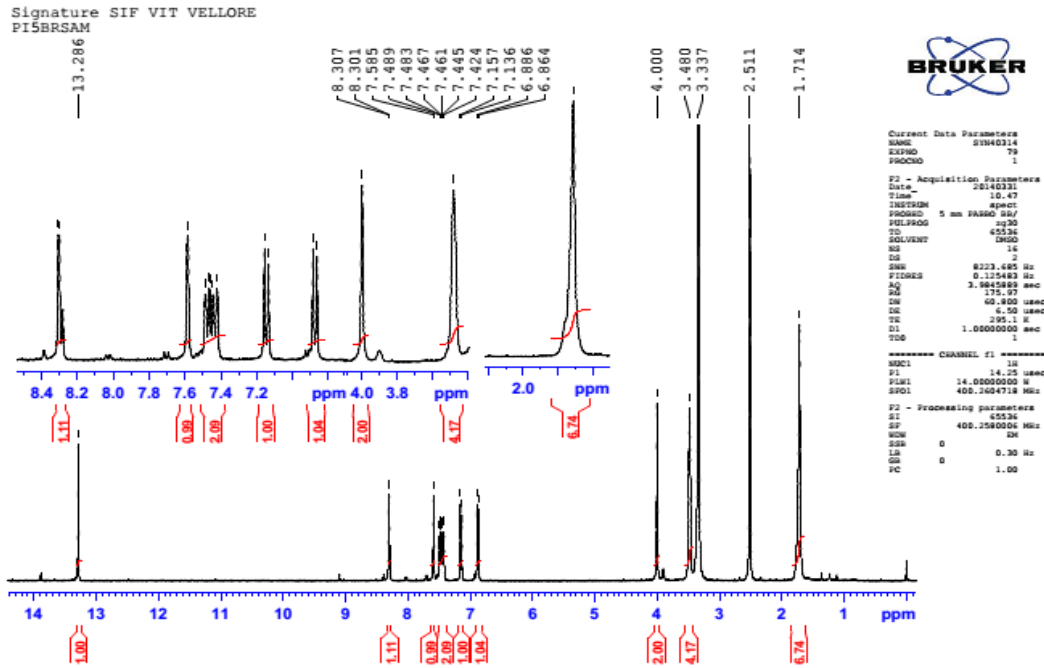

# <sup>13</sup>C-NMR spectrum of 4j

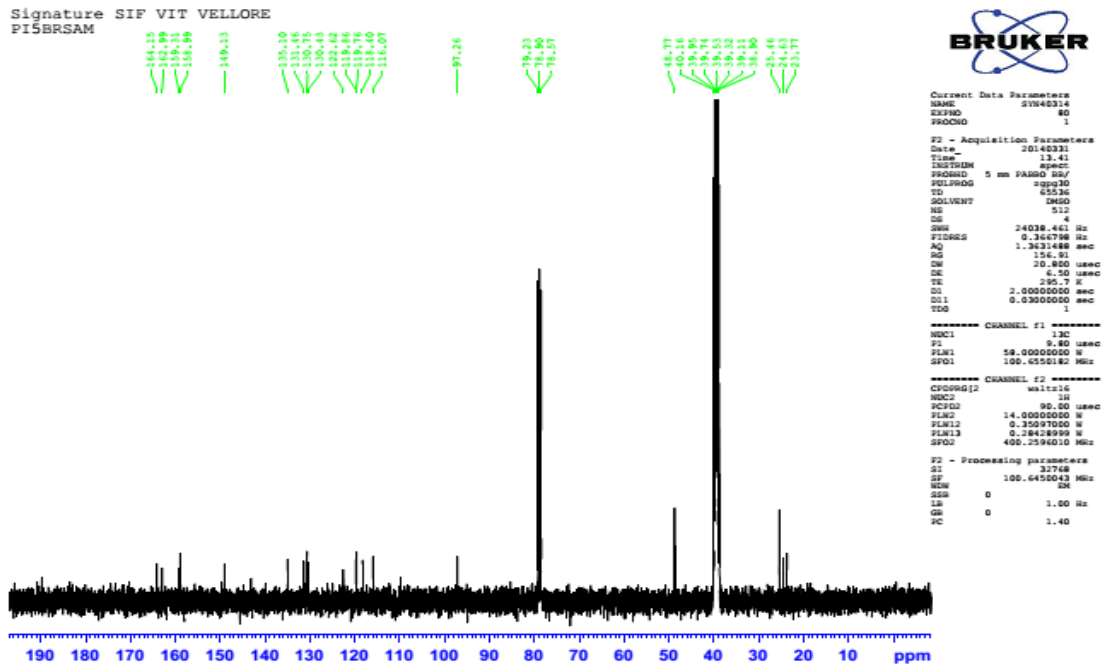

# <sup>1</sup>H-NMR spectrum of 4k

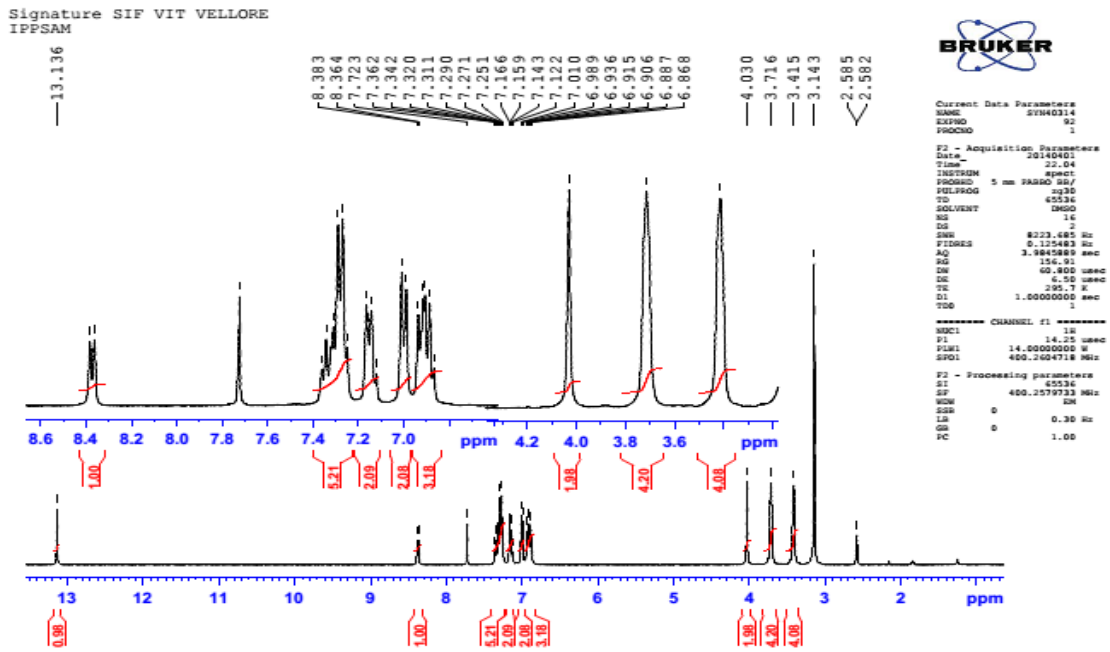

# <sup>13</sup>C-NMR spectrum of 4k

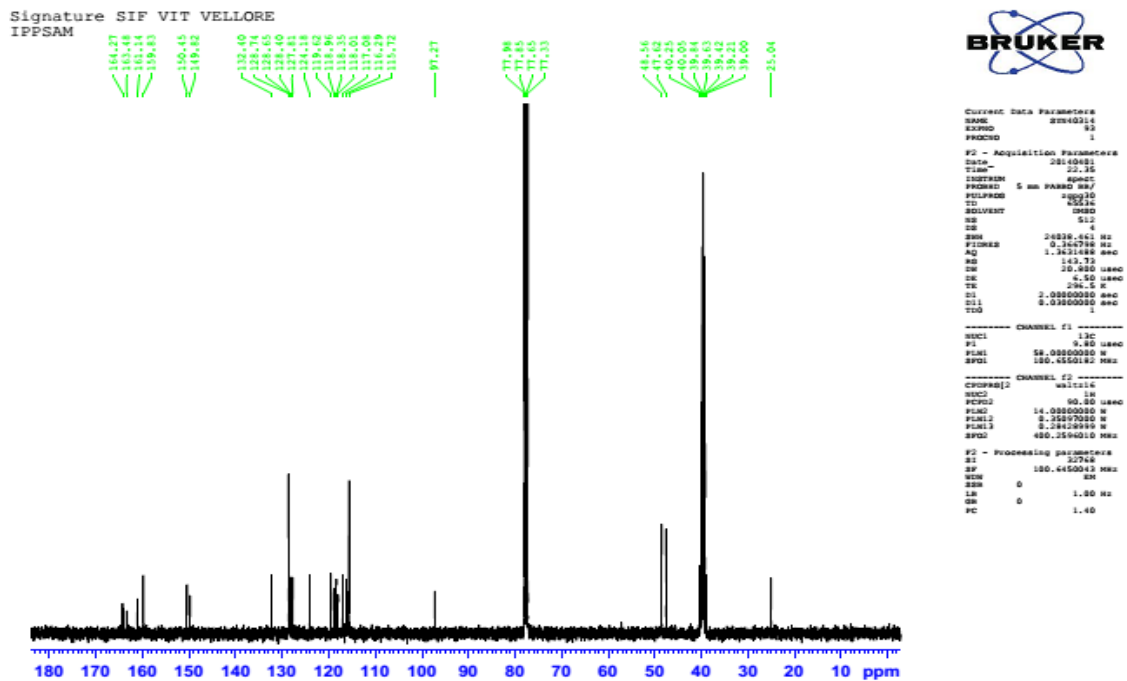

# <sup>1</sup>H-NMR spectrum of 4l

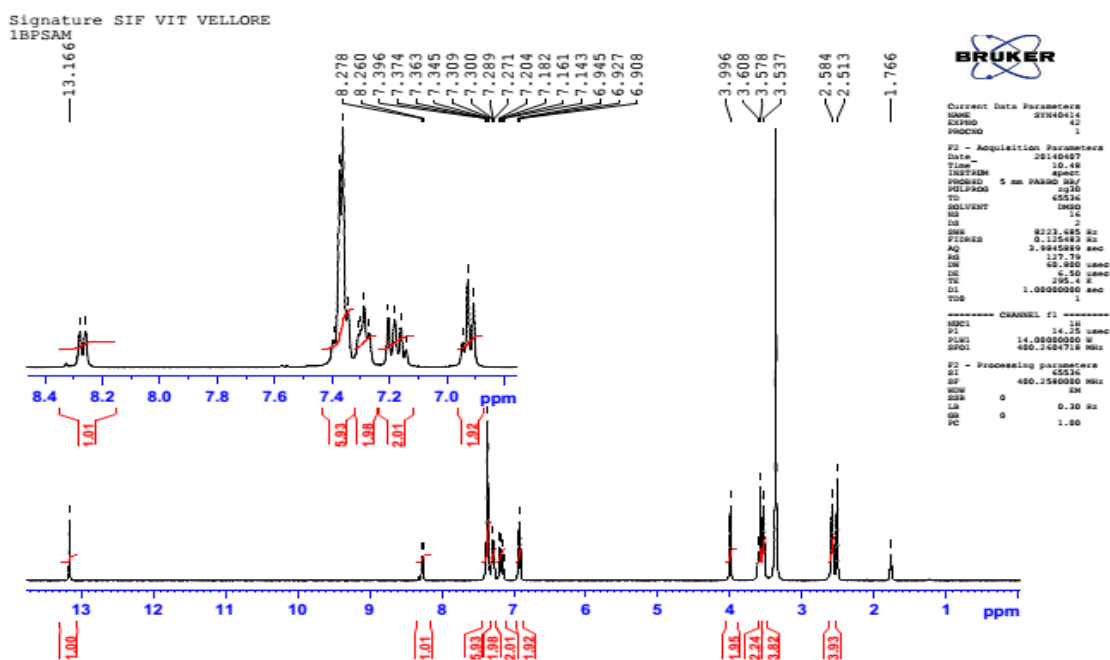

# <sup>13</sup>C-NMR spectrum of 4l

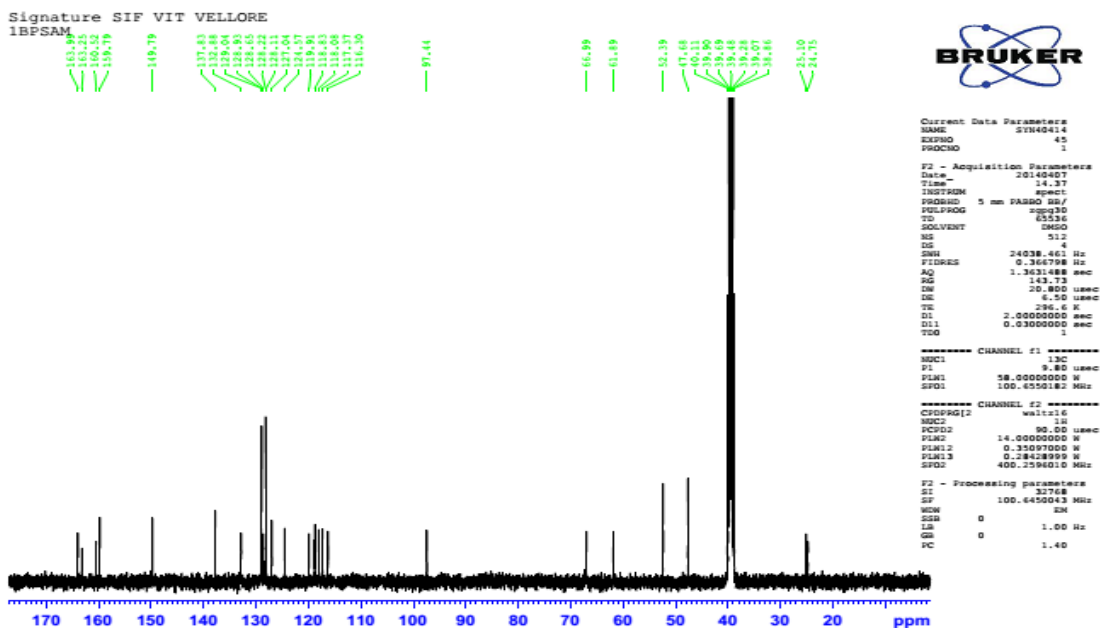

# <sup>1</sup>H-NMR spectrum of 4m

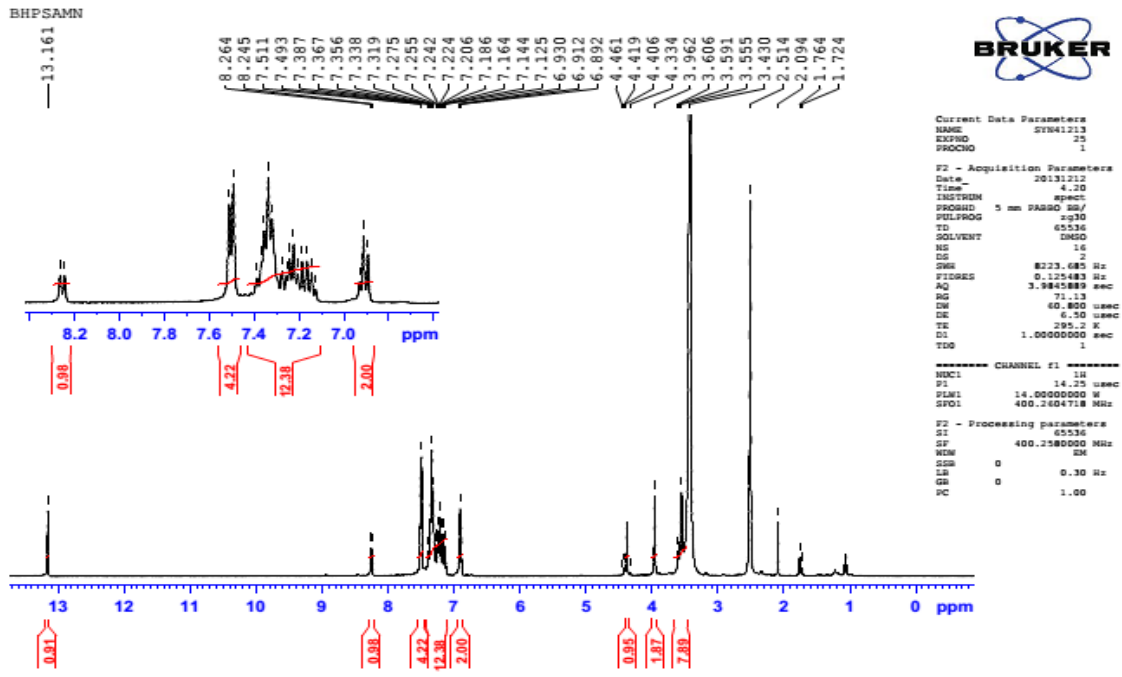

# <sup>13</sup>C-NMR spectrum of 4m

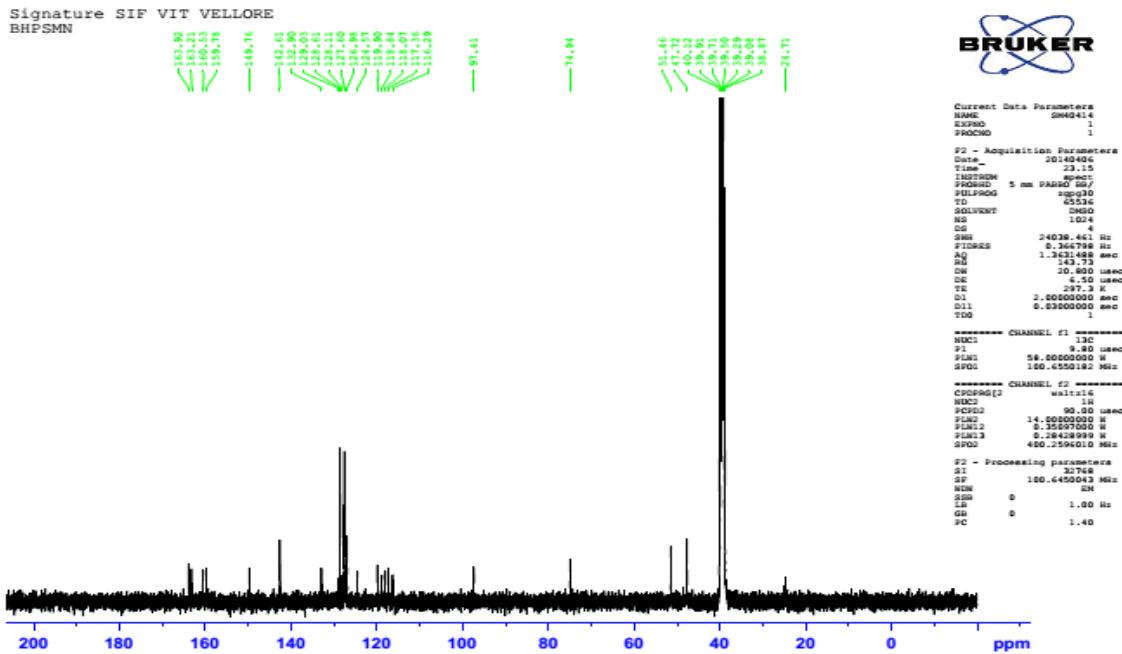

# <sup>1</sup>H-NMR spectrum of 4n

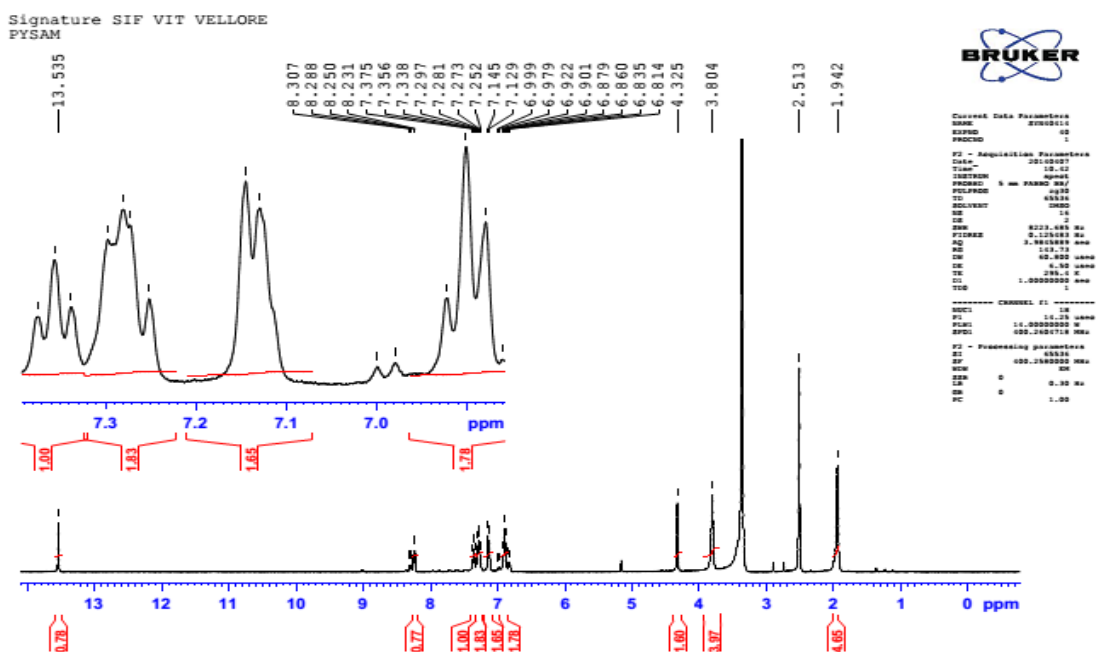

# <sup>13</sup>C-NMR spectrum of 4n

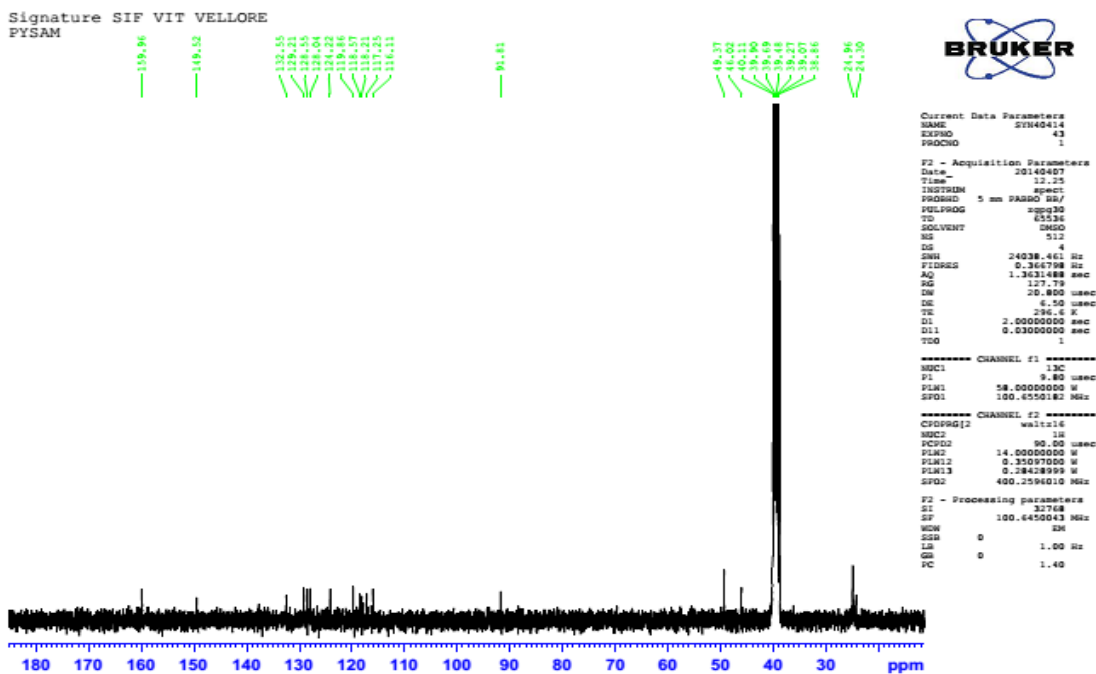

# <sup>1</sup>H-NMR spectrum of 4o

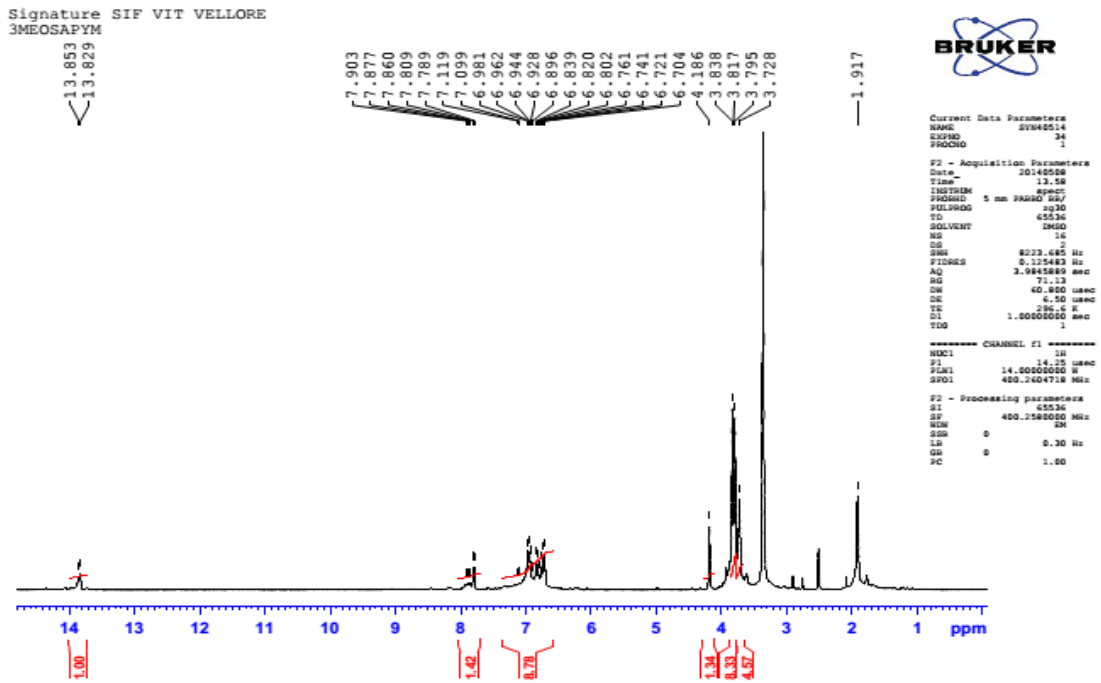

# <sup>13</sup>C-NMR spectrum of 4o

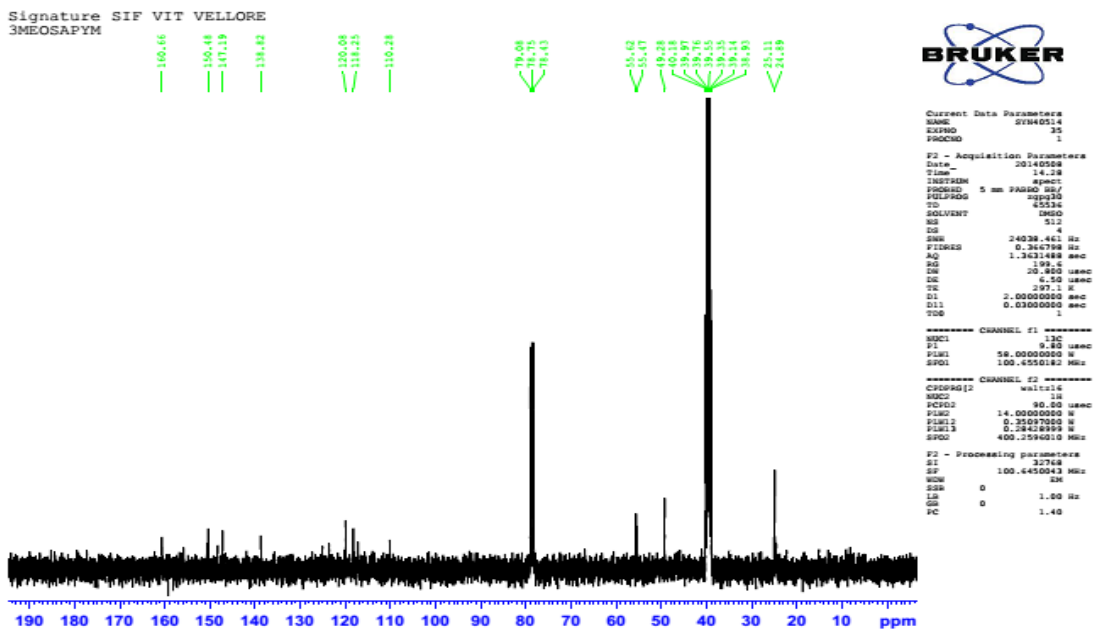

# <sup>1</sup>H-NMR spectrum of 4p

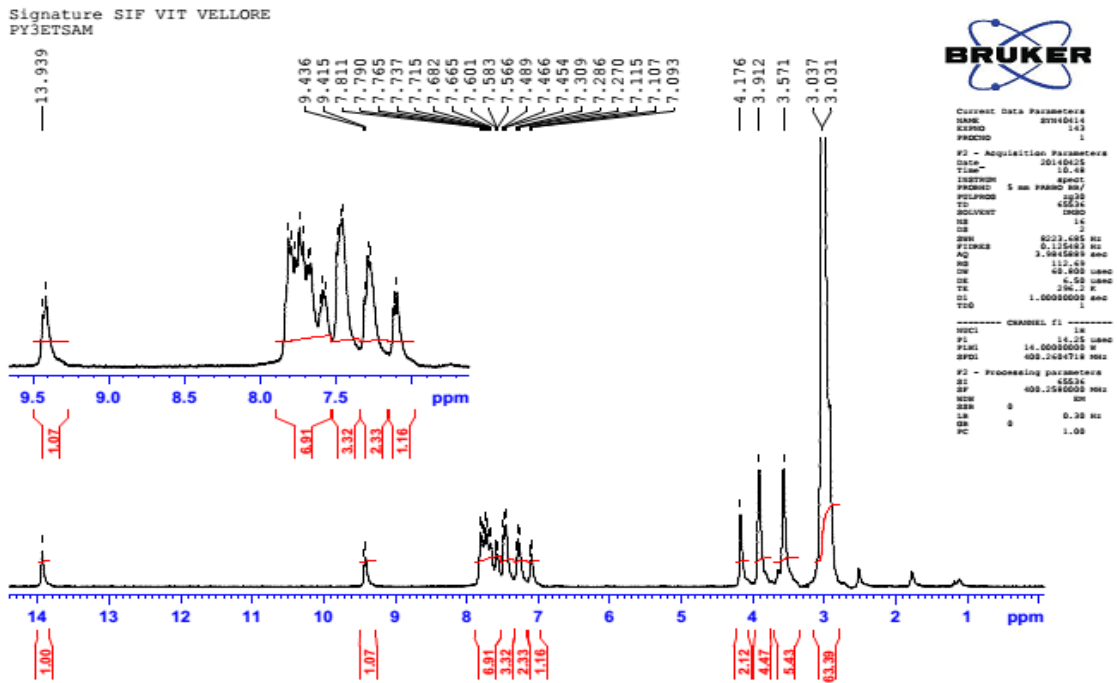

# <sup>13</sup>C-NMR spectrum of 4p

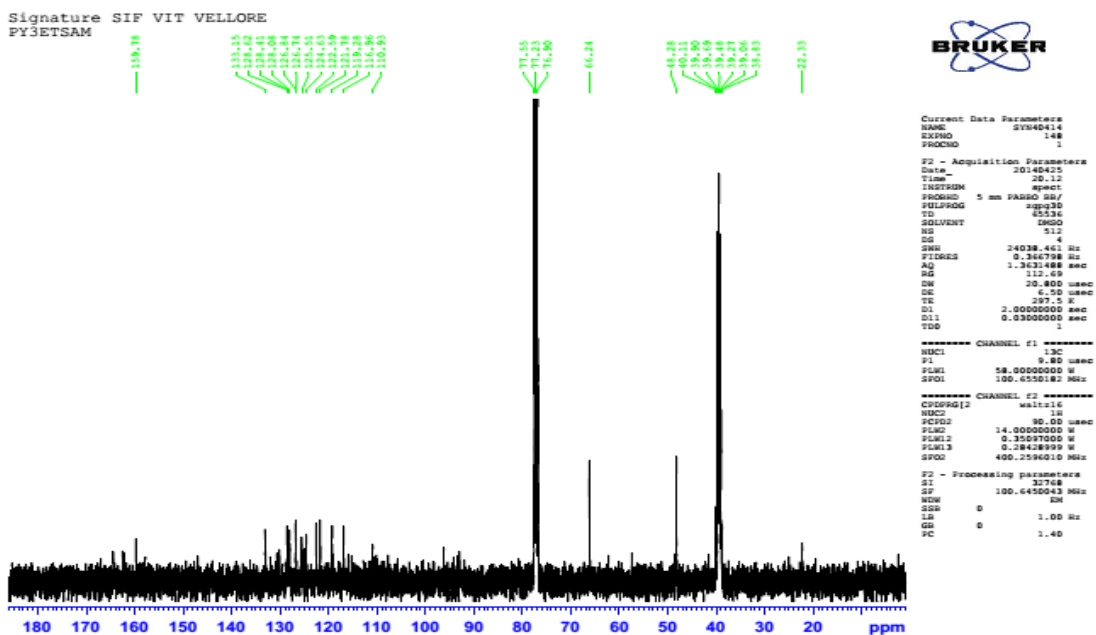



# <sup>1</sup>H-NMR spectrum of 4q

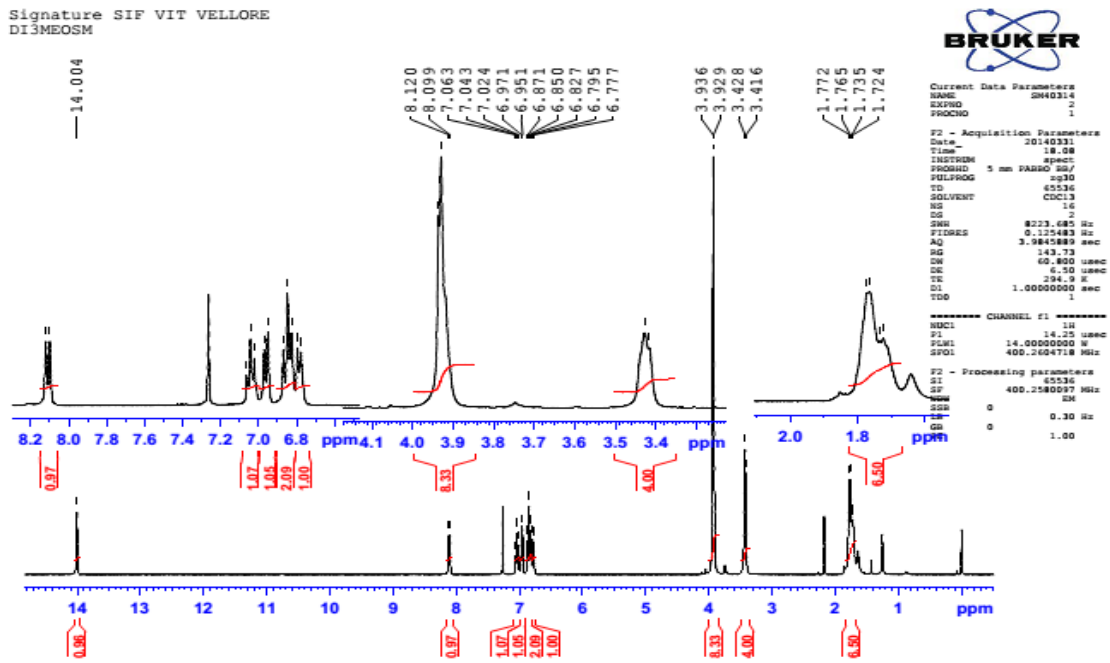

# <sup>13</sup>C-NMR spectrum of 4q

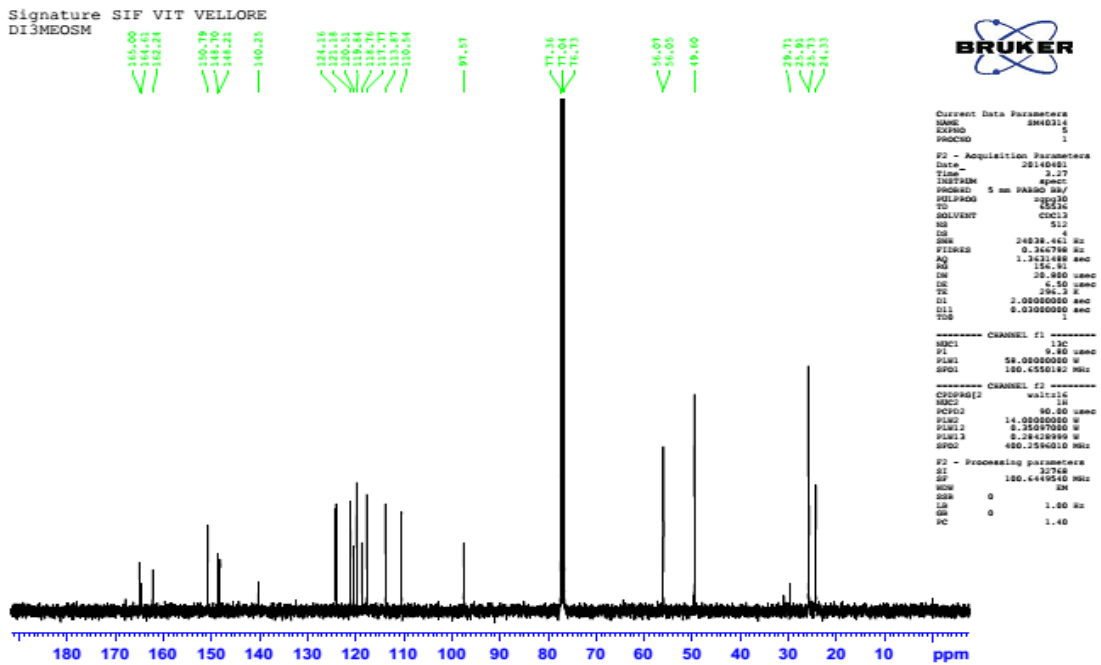

# <sup>1</sup>H-NMR spectrum of 4r

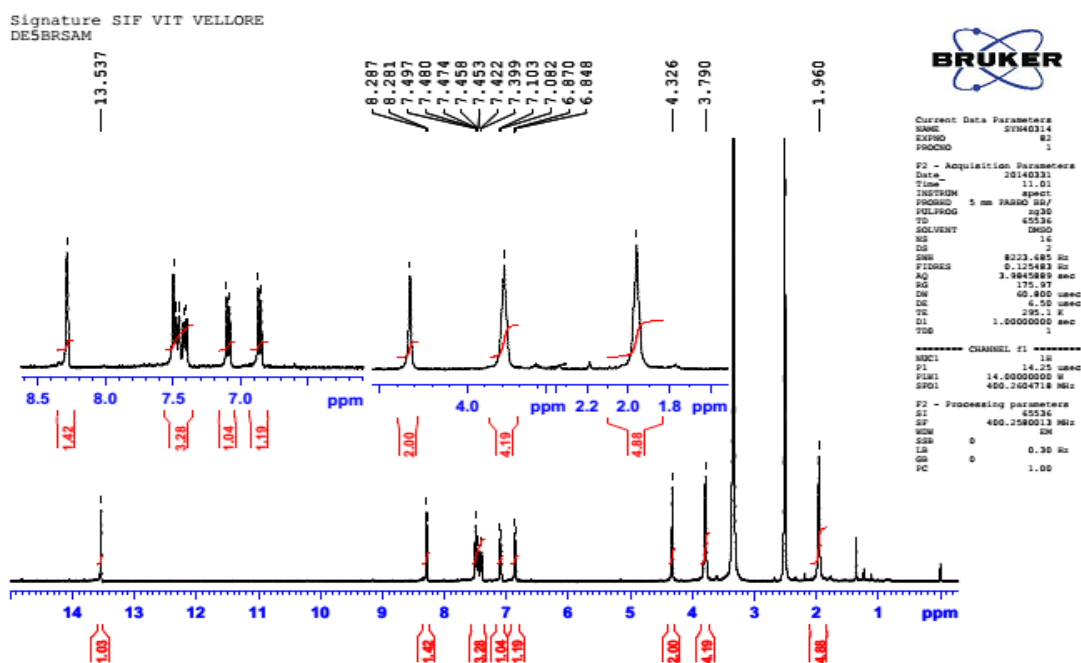

# <sup>13</sup>C-NMR spectrum of 4r

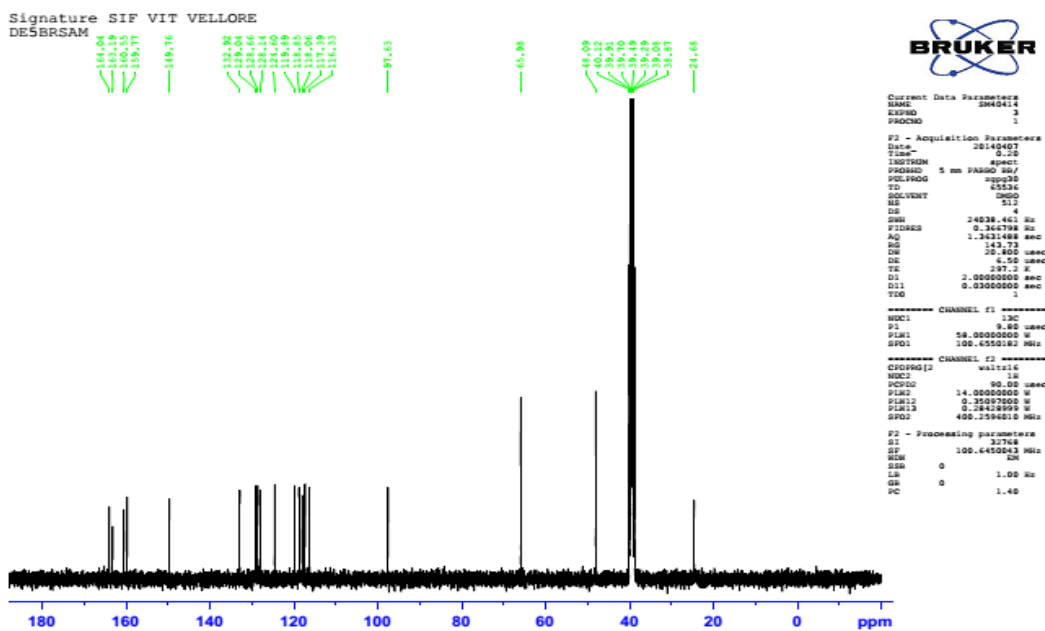

Supplement: c4ra16263c1.pdf [file c4ra16263c1.pdf]
